# Supplementary material for: Comparative Efficacy of 14-Day Tegoprazan-Based Triple vs. 10-Day Tegoprazan-Based Concomitant Therapy for Helicobacter pylori Eradication
Source: MDPI journal article supplement (doi:10.3390/jpm12111918), 2022-11-17
Supplement: s1 [file s1]

Table S1. Adherence and adverse events of second-line *H. pylori* eradication therapy

|                                         | 14-day rabeprazole-based PBMT therapy<br>(N=21) | 14-day tegoprazan-based PBMT therapy<br>(N=71) | <i>P</i> -value  |
|-----------------------------------------|-------------------------------------------------|------------------------------------------------|------------------|
| <b>Adherence,<sup>a</sup> n (%)</b>     | 18 (85.7)                                       | 60 (84.5)                                      | > 0.999          |
| Loss of follow-up                       | 1 (4.8)                                         | 8 (11.3)                                       | 0.679            |
| Insufficient medication                 | 2 (9.5)                                         | 3 (4.2)                                        | 0.320            |
| <b>Adverse event,<sup>b</sup> n (%)</b> |                                                 |                                                |                  |
| Any adverse event                       | 13 (61.9)                                       | 32 (45.1)                                      | 0.175            |
| Mild                                    | 11 (52.4)                                       | 29 (40.8)                                      |                  |
| Moderate                                | 1 (4.8)                                         | 3 (4.2)                                        |                  |
| Severe                                  | 1 (4.8)                                         | 0 (0.0)                                        |                  |
| General weakness                        | 1 (4.8)                                         | 1 (1.4)                                        | 0.406            |
| Dizziness                               | 1 (4.8)                                         | 1 (1.4)                                        | 0.406            |
| Hedache                                 | 0 (0.0)                                         | 1 (1.4)                                        | > 0.999          |
| Myalgia                                 | 1 (4.8)                                         | 1 (1.4)                                        | 0.406            |
| Acid regurgitation                      | 0 (0.0)                                         | 0 (0.0)                                        | N/A <sup>d</sup> |
| Nausea or vomiting                      | 8 (38.1)                                        | 17 (23.9)                                      | 0.200            |
| Dysgeusia                               | 2 (9.5)                                         | 8 (11.3)                                       | > 0.999          |
| Abdominal discomfort                    | 1 (4.8)                                         | 6 (8.5)                                        | > 0.999          |
| Abdominal pain                          | 0 (0.0)                                         | 1 (1.4)                                        | >0.999           |
| Diarrhea                                | 2 (9.5)                                         | 11 (15.5)                                      | 0.725            |
| Constipation                            | 0 (0.0)                                         | 0 (0.0)                                        | N/A <sup>d</sup> |
| Skin rash                               | 2 (9.5)                                         | 0 (0.0)                                        | 0.050            |
| Others <sup>c</sup>                     | 2 (9.5)                                         | 3 (4.2)                                        | 0.320            |

<sup>a</sup>Adherence is determined as administration of  $\geq 80\%$  of prescribed medications.

<sup>b</sup>Percentage is calculated based on the ITT population.

<sup>c</sup>Other adverse events include dry mouth and sweating.

<sup>d</sup>N/A indicates that *P*-value cannot be calculated because the number of events in both groups is zero.

PBMT indicates bismuth-containing quadruple therapy comprising a PPI or P-CAB, bismuth, metronidazole, and tetracycline.

ITT, intention-to-treat; PP, per protocol; PPI, proton pump inhibitor; P-CAB, potassium-competitive acid blocker; N/A, not applicable.
